# Supplementary material for: Prussian blue coated with reduced graphene oxide as high-performance cathode for lithium–Sulfur batteries
Source: Royal Society of Chemistry journal article supplement (doi:10.1039/d0ra04901h), 2020-01-01
Supplement: d0ra04901h1.pdf [file d0ra04901h1.pdf]

## Supporting Information

### Prussian Blue Coated with Reduced Graphene Oxide as High-Performance Cathodes for Lithium–Sulfur Batteries

Minghua Chen\*, Zhanpeng Zhang, Xiaoxue Liu\*, Yu Li, Yuqing Wang, He Fan, Xinqi Liang\*,

Qingguo Chen

Key Laboratory of Engineering Dielectric and Applications (Ministry of Education), Harbin University of Science and Technology, Harbin 150080, P. R. China

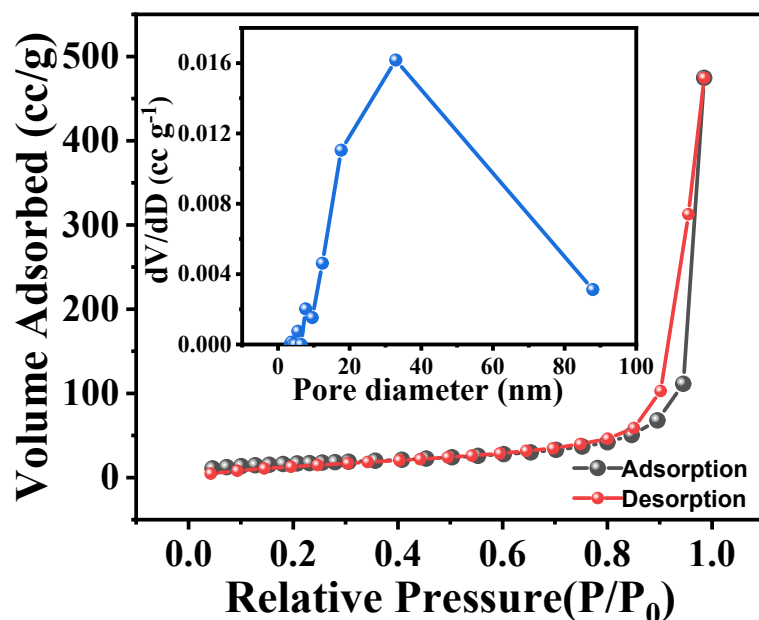

**Fig. S1** (a) BET N<sub>2</sub> adsorption-desorption isotherm curves of PB. (Inset: the corresponding pore size distribution profile)

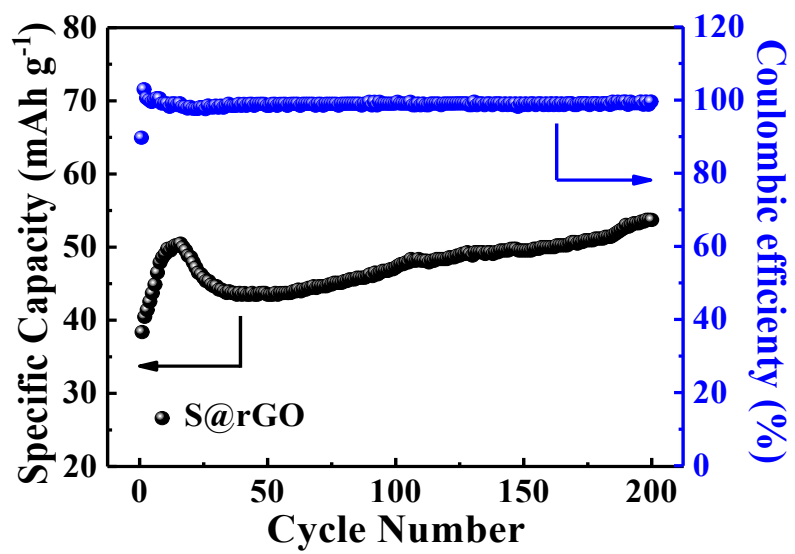

Fig. S2 Cycling stability of S@rGO electrodes at 0.5 C rate for 200 cycles. The sulfur mass loading of the simple cathodes was about 0.8 mg cm<sup>-2</sup>.

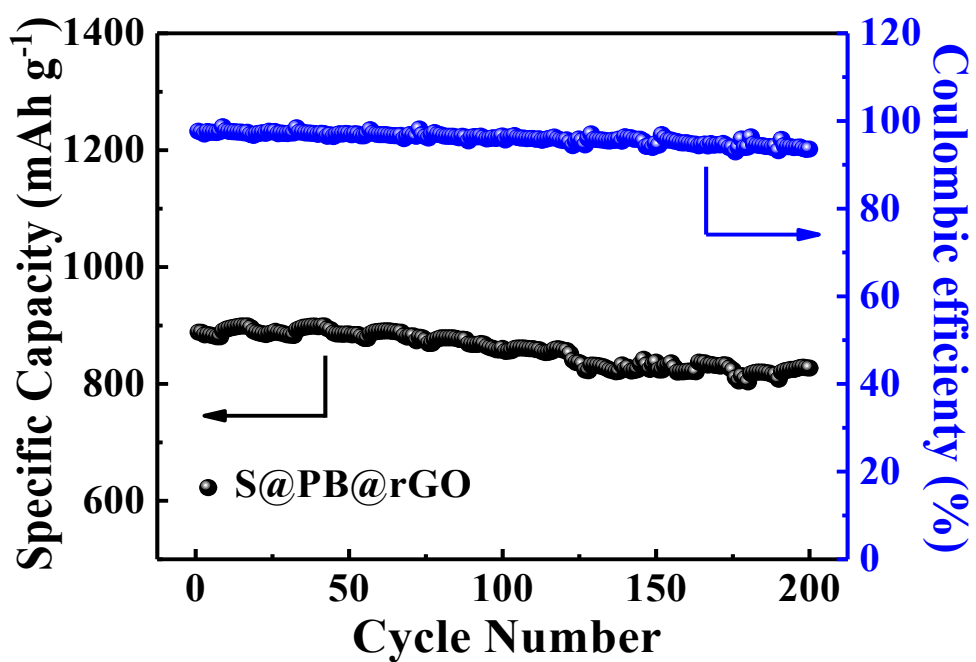

Fig. S3 Cycling stability of S@PB@rGO electrode at 0.5 C rate for 200 cycles. The sulfur mass loading of the simple cathodes was about 0.8 mg cm<sup>-2</sup>.

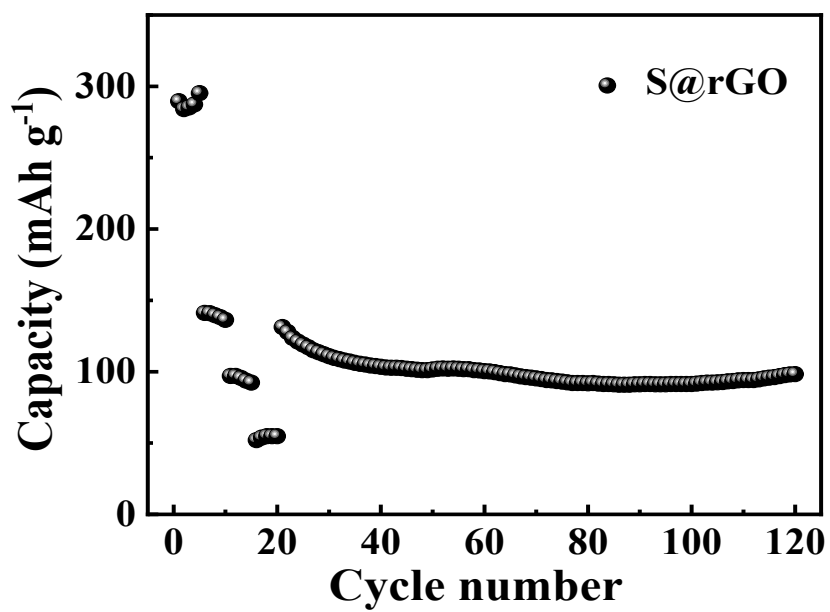

Fig. S4 Rate capacity of S@rGO.

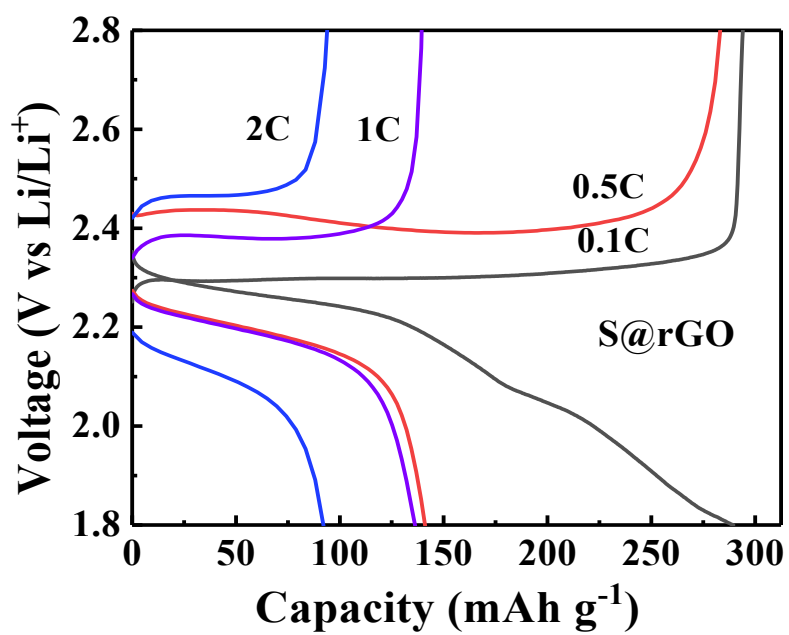

Fig. S5 The discharge/charge curves of S@ rGO electrodes at different current densities. The sulfur mass loading of the simple cathodes was about 0.8 mg cm<sup>-2</sup>.

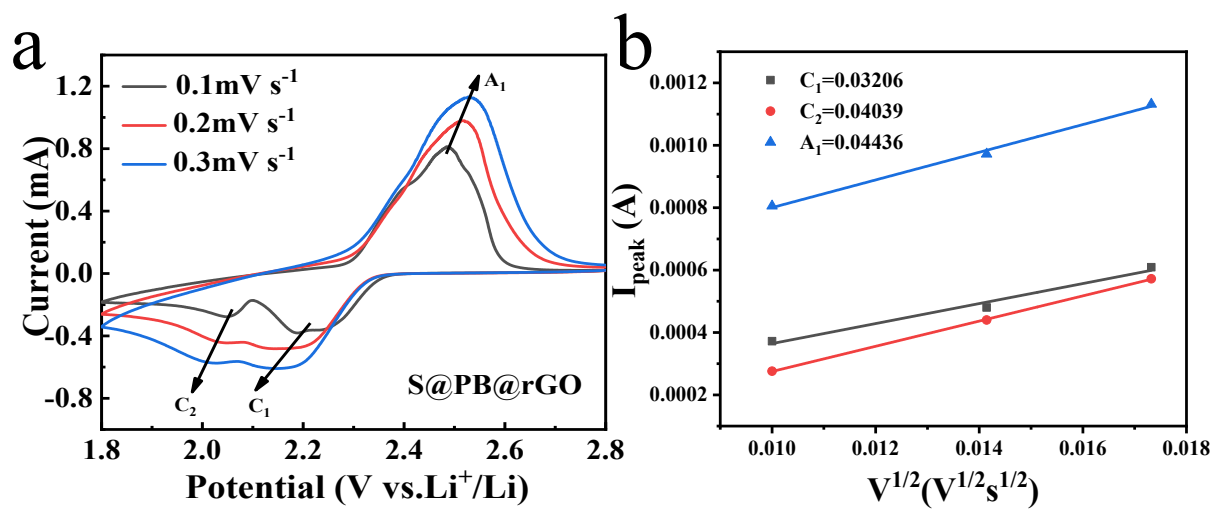

Fig. S6 Cyclic voltammograms of the tested batteries (a) and the linear fits (b) of S@PB@rGO electrode in the voltage range of 1.8–2.8 V at 0.1, 0.2, and 0.3 mV s<sup>-1</sup>.
